# Supplementary material for: Sources of intraspecific variation in the isotopic niche of a semi-aquatic predator in a human-modified landscape
Source: PeerJ journal article supplement (doi:10.7717/peerj.15915), 2023-08-30

# PeerJ - Life and Environment

## Supplemental Information 2

### **Sources of intraspecific variation in the isotopic niche of a semi-aquatic top predator in a human-modified landscape**

André Costa Pereira<sup>1,\*</sup>, Gabriela Bielefeld Nardoto<sup>2</sup>, Guarino Rinaldi Colli<sup>1</sup>

<sup>1</sup> Departamento de Zoologia, Instituto de Ciências Biológicas, Universidade de Brasília, Brasília, Distrito Federal, Brasil.

<sup>2</sup> Departamento de Ecologia, Instituto de Ciências Biológicas, Universidade de Brasília, Brasília, Distrito Federal, Brasil.

\* Corresponding author

E-mail: [rancoper@gmail.com](mailto:rancoper@gmail.com)

ORCID:

ACP (ORCID: 0000-0003-4432-7163)

GBN (ORCID: 0000-0001-8062-7417)

GRC (ORCID: 0000-0002-2628-5652)

**Table S1.** Probability of difference between groups for tissues, habitats, and size classes. The first group was the largest group (reference for comparisons).

| Tissue                                 |             |
|----------------------------------------|-------------|
| Comparison                             | Probability |
| $SEA_{B-RBC} > SEA_{B-muscle}$         | 0.99        |
| $SEA_{B-plasma} > SEA_{B-muscle}$      | 0.98        |
| $SEA_{B-RBC} > SEA_{B-claw}$           | 0.91        |
| $SEA_{B-scute} > SEA_{B-muscle}$       | 0.86        |
| $SEA_{B-claw} > SEA_{B-muscle}$        | 0.86        |
| $SEA_{B-RBC} > SEA_{B-scute}$          | 0.85        |
| $SEA_{B-RBC} > SEA_{B-plasma}$         | 0.74        |
| $SEA_{B-plasma} > SEA_{B-claw}$        | 0.74        |
| $SEA_{B-plasma} > SEA_{B-scute}$       | 0.72        |
| $SEA_{B-scute} > SEA_{B-claw}$         | 0.54        |
| Habitat                                |             |
| $SEA_{B-pond} > SEA_{B-river}$         | 1.0         |
| $SEA_{B-pond} > SEA_{B-ditch}$         | 1.0         |
| $SEA_{B-lake} > SEA_{B-river}$         | 1.0         |
| $SEA_{B-lake} > SEA_{B-ditch}$         | 1.0         |
| $SEA_{B-pond} > SEA_{B-lake}$          | 0.86        |
| $SEA_{B-ditch} > SEA_{B-river}$        | 0.80        |
| Size class                             |             |
| $SEA_{B-Class II} > SEA_{B-Class III}$ | 1.0         |
| $SEA_{B-Class II} > SEA_{B-Class IV}$  | 1.0         |
| $SEA_{B-Class III} > SEA_{B-Class IV}$ | 1.0         |
| $SEA_{B-Class I} > SEA_{B-Class II}$   | 0.99        |
| $SEA_{B-Class I} > SEA_{B-Class IV}$   | 0.99        |
| $SEA_{B-Class I} > SEA_{B-Class III}$  | 0.80        |

**Figure S1.** Residual diagnoses of normality, outlier, and overdispersion of the best model in the GLM: (A) QQ plot residuals, and (B) Residuals vs. predicted residuals relationship. Normality, outlier, and overdispersion had no significance.

**Figure S2.** Estimated niche width and isotopic niches for habitats. Habitat data for (A, B) plasma, (C, D) muscle, (E, F) RBC, (G, H) claw, and (I, J) scute. Solid lines represent the core isotopic niche space. Black dots correspond to the mean and boxes represent the 50%, 75% and 95% credible intervals.

**Figure S3.** Estimated niche width and isotopic niches for sexes. Sex data in the (A, B) river, (C, D) lake, (E, F) pond, and (G, H) ditch. Scatter plots had the isotopic values from all tissues. Solid lines represent the core isotopic niche space. Black dots correspond to the mean and boxes represent the 50%, 75% and 95% credible intervals.

**Figure S4.** Estimated niche width and isotopic niches for sexes. Sex data for (A, B) plasma, (C, D) muscle, (E, F) RBC, (G, H) claw, and (I, J) scute. Scatter plots had the isotopic values from all habitats. Solid lines represent the core isotopic niche space. Black dots correspond to the mean and boxes represent the 50%, 75% and 95% credible intervals.

**Figure S5.** Estimated niche width and isotopic niches for size classes. Size class data in the (A, B) all habitats, (C, D) river, (E, F) lake, (G, H) pond, and (I, J) ditch. Colors relate to size class, while bold words comprehend female's size classes. Scatter plots had the isotopic values from all tissues. Solid lines represent the core isotopic niche space. Black dots correspond to the mean and boxes represent the 50%, 75% and 95% credible intervals.

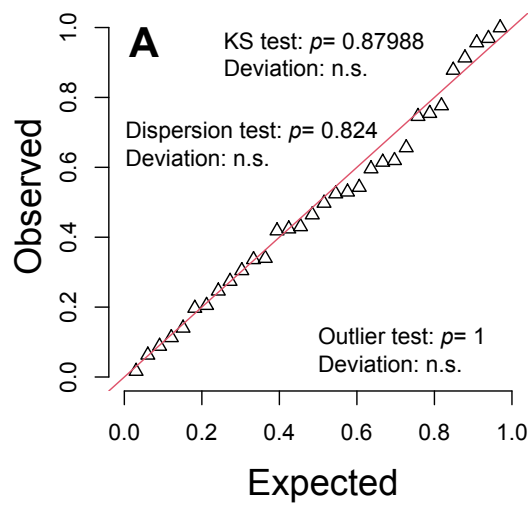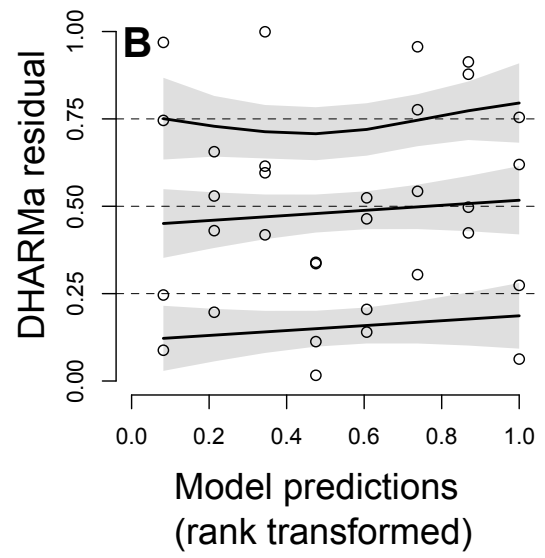

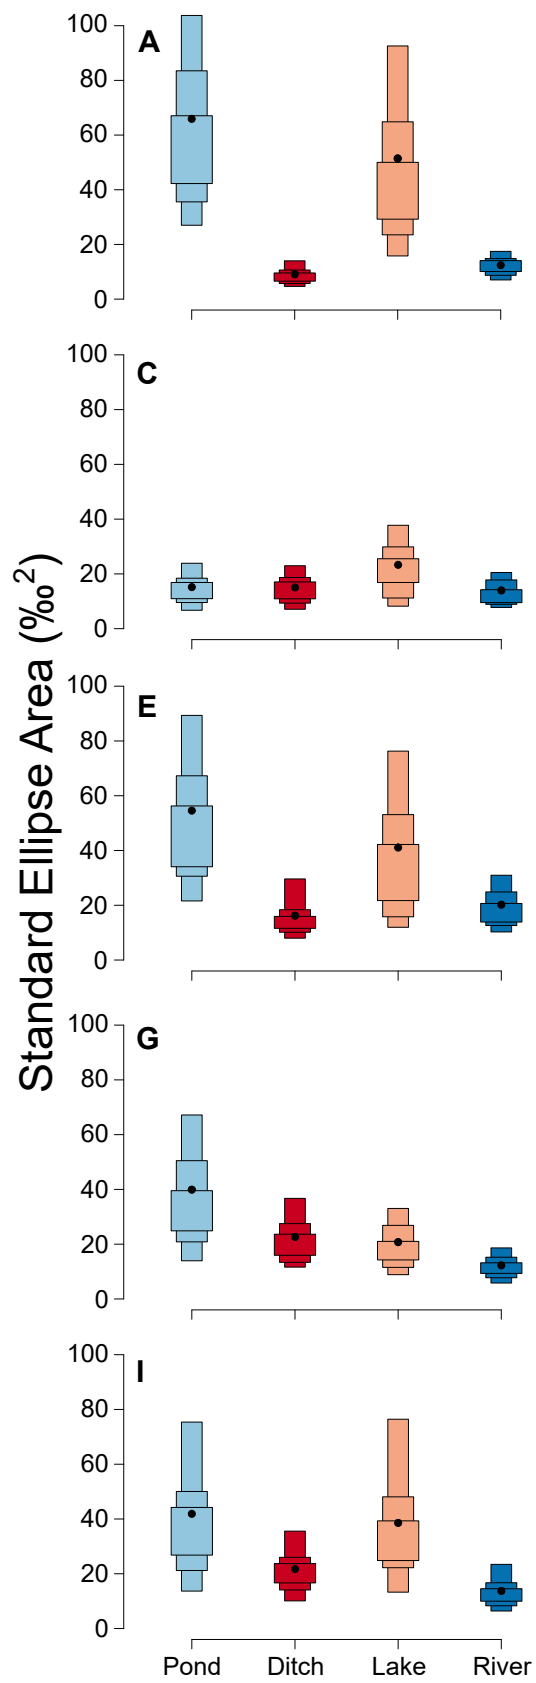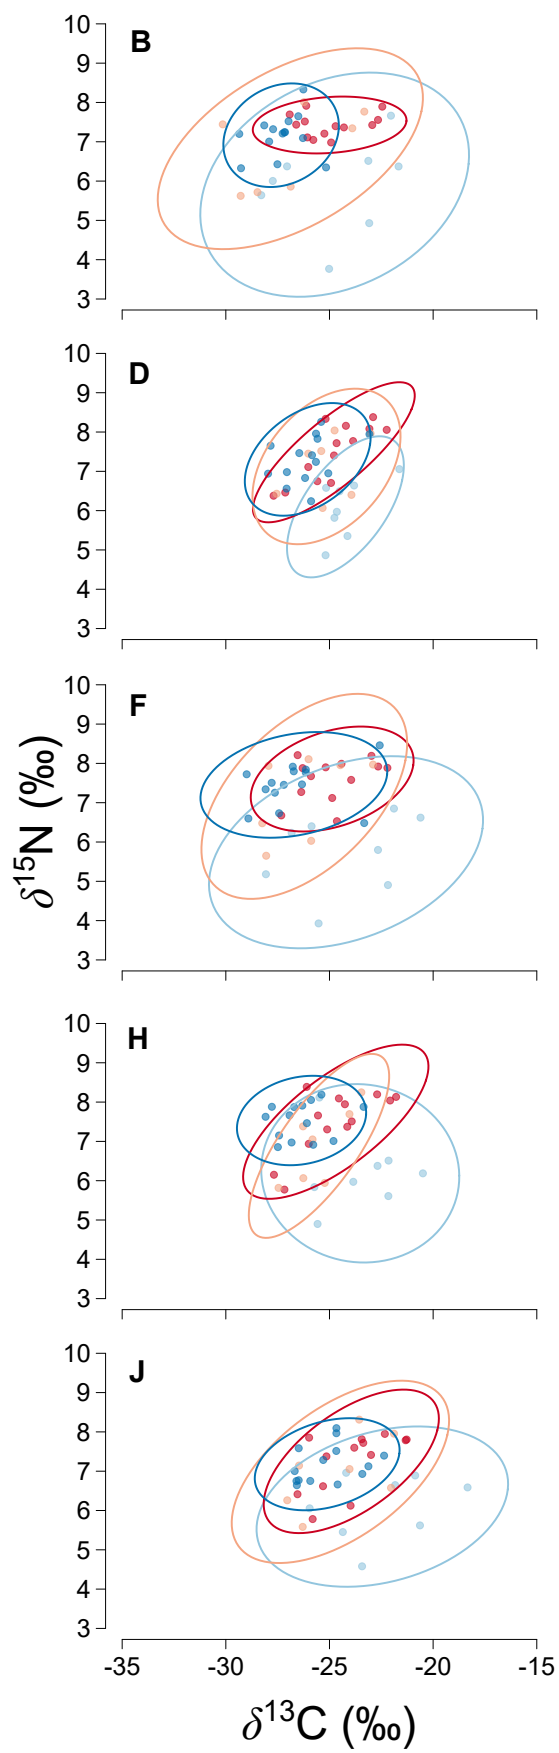

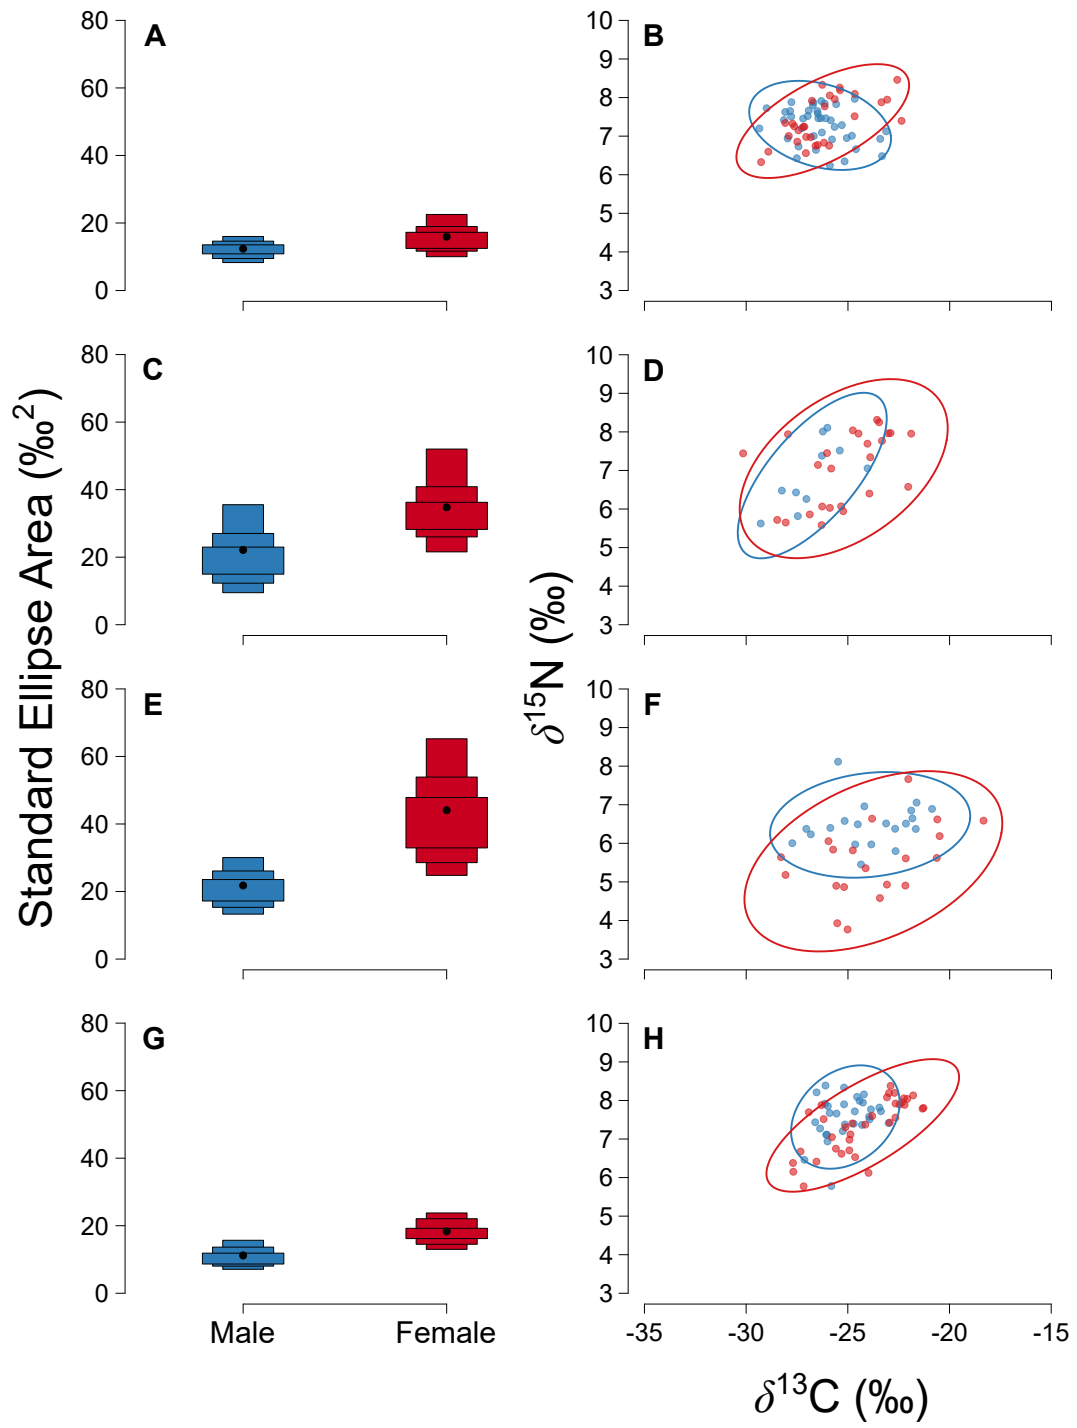

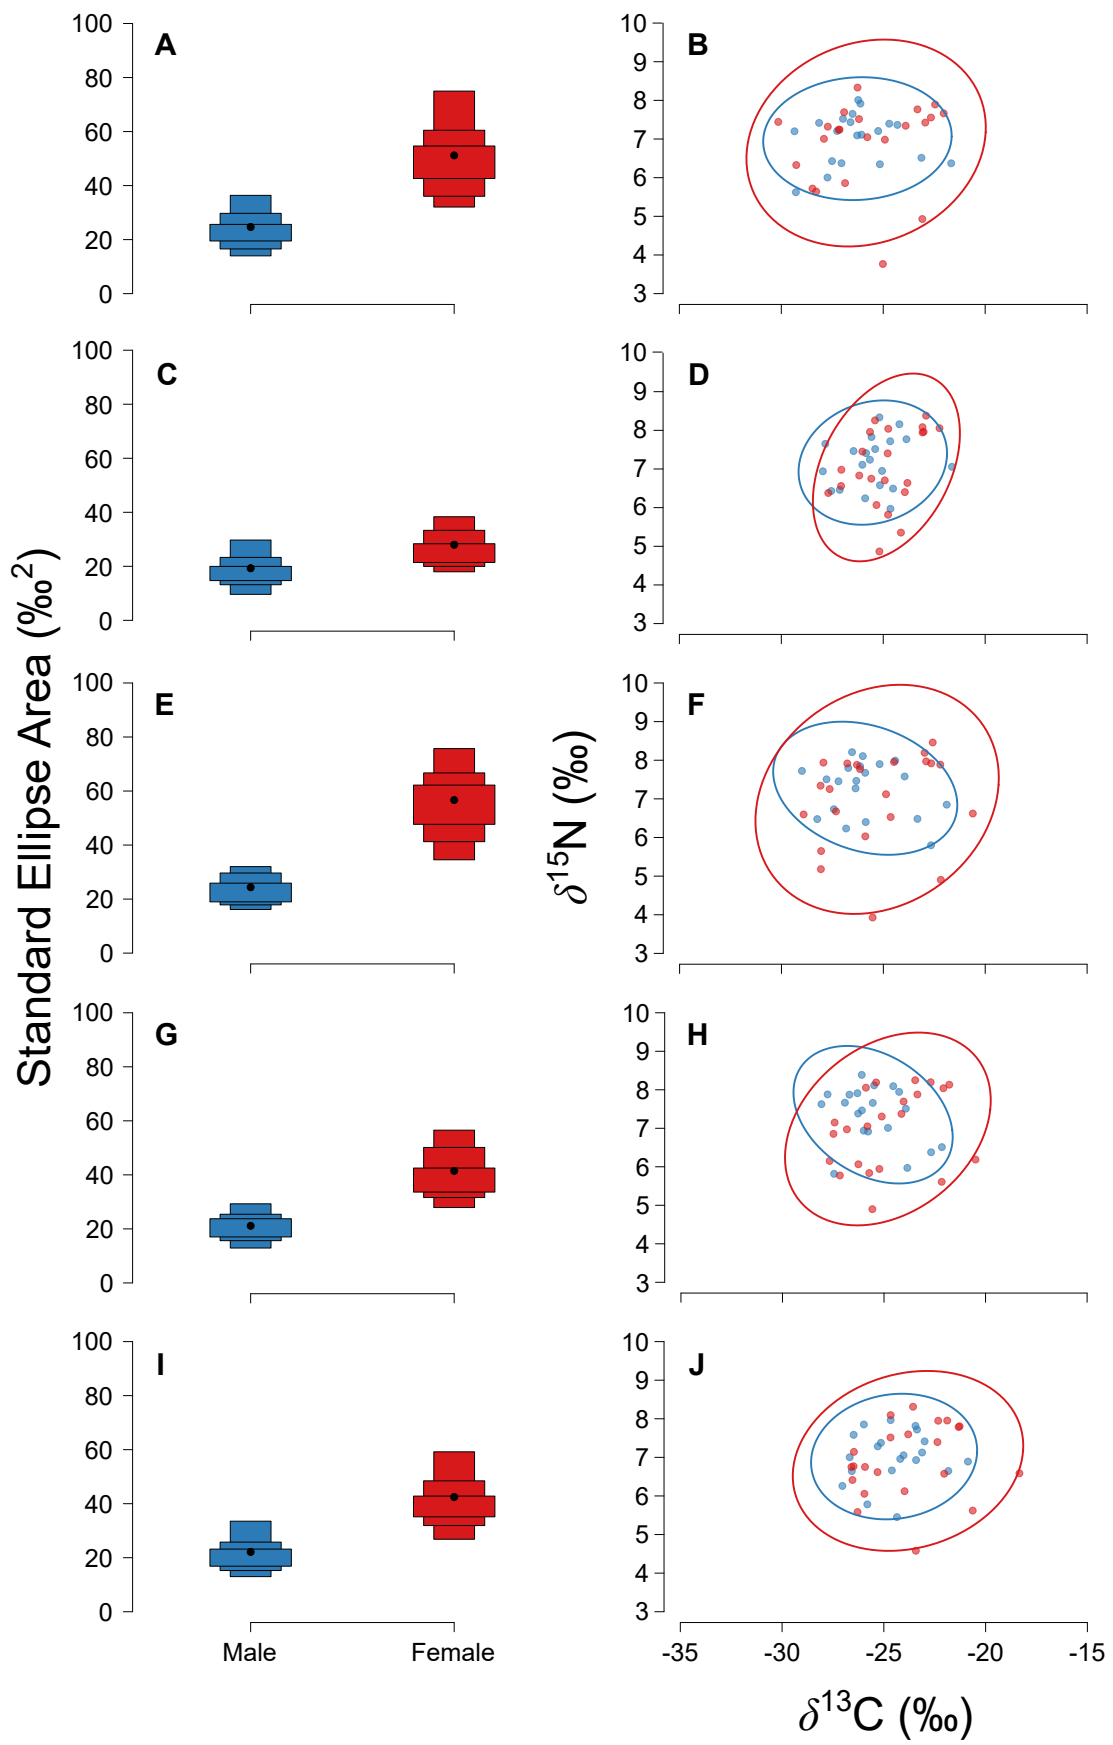

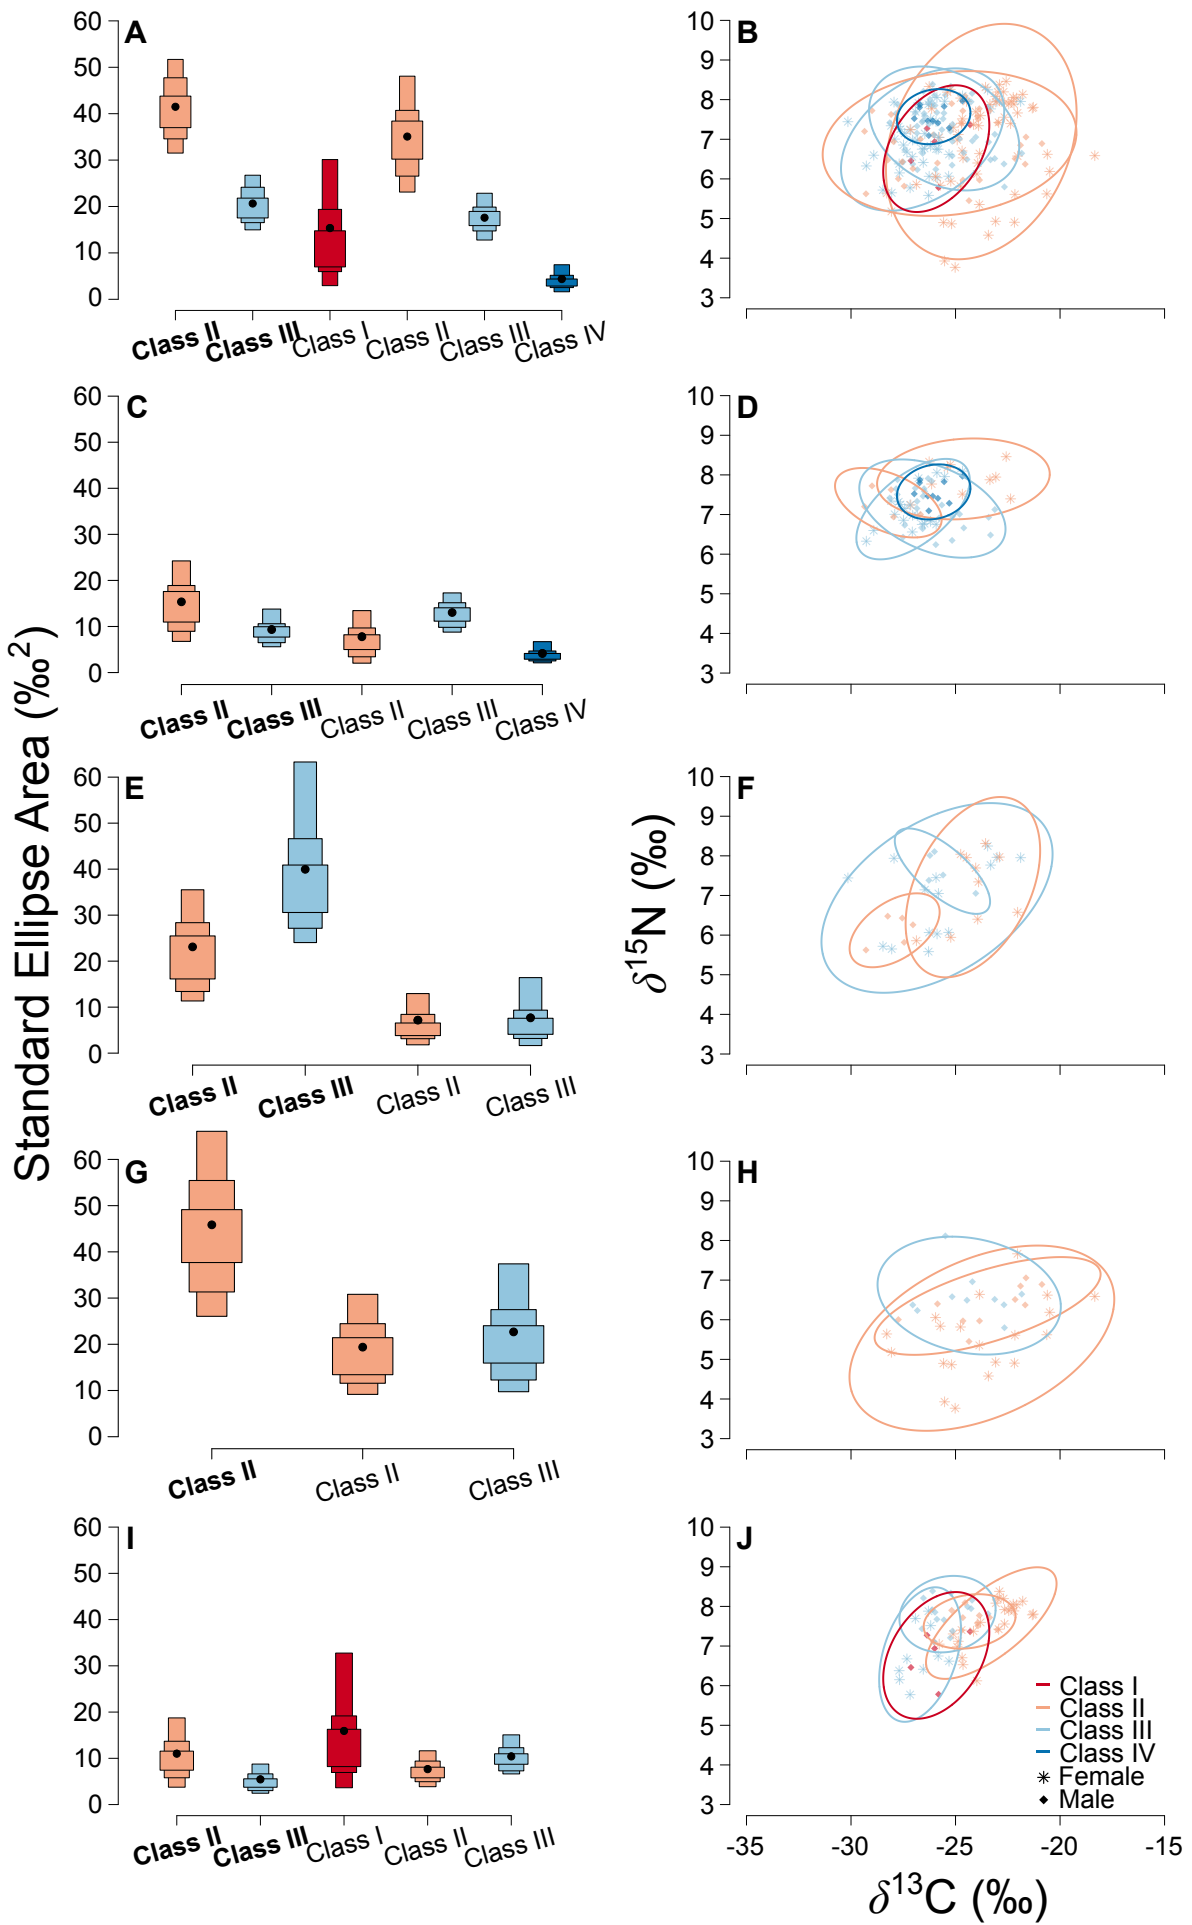

Supplement: PeerJ_R2_Supplemental_Information_2_revised.pdf [file PeerJ_R2_Supplemental_Information_2_revised.pdf]
